# Supplementary material
Source: publisher figshare collection journal article supplement (https://acs.figshare.com/ndownloader/files/12080018)
Supplement: Supplementary file 1 [file 12080018]

Supporting Information for

Atomic force microscopy study on stiffness of nanosized

liposomes containing charged lipids

Yuki Takechi-Haraya,<sup>1</sup> Yukihiro Goda,<sup>2</sup> and Kumiko Sakai-Kato<sup>1,\*</sup>

<sup>1</sup>Division of Drugs, National Institute of Health Sciences, 3-25-26 Tonomachi, Kawasaki-ku, Kawasaki City, Kanagawa 210-9501, Japan, <sup>2</sup>National Institute of Health Sciences, 3-25-26 Tonomachi, Kawasaki-ku, Kawasaki City, Kanagawa 210-9501, Japan

\*To whom correspondence should be addressed:  
kumikato@nihs.go.jp

Number of pages: 5

Number of Table: 1

Number of Figures: 3

**Table S1.** Heights and area-equivalent diameters of liposomes analyzed by AFM

| Lipid composition  | Height (nm) <sup>a</sup> | AD (nm) <sup>a</sup> |
|--------------------|--------------------------|----------------------|
| DOPC (100)         | 46 ± 3.6                 | 84 ± 2.8             |
| DOPC/DOTAP (50/50) | 55 ± 1.0                 | 90 ± 18              |
| DOPC/DOPG (50/50)  | 46 ± 1.8                 | 117 ± 7.9            |
| DSPC/DSTAP (90/10) | 66 ± 2.2                 | 97 ± 4.6             |
| DSPC/DSTAP (50/50) | 45 ± 8.9                 | 88 ± 17              |
| DSPC/DSPG (50/50)  | 44 ± 14                  | 84 ± 11              |

All values are means ± S.D of three independent samples. The values in brackets are %mol. DOPC, 1,2-dioleoyl-*sn*-glycero-3-phosphocholine; DOTAP, 1,2-dioleoyl-3-trimethylammoniumpropane; DOPG, 1,2-dioleoyl-*sn*-glycero-3-phospho-(1'-*rac*-glycerol); DSPC, 1,2-distearoyl-*sn*-glycero-3-phosphocholine; DSTAP, 1,2-distearoyl-3-trimethylammoniumpropane; DSPG, 1,2-distearoyl-*sn*-glycero-3-phospho-(1'-*rac*-glycerol). <sup>a</sup>Regarding each parameter, there were no significant differences between the liposome samples by Bonferroni's multiple comparison test.

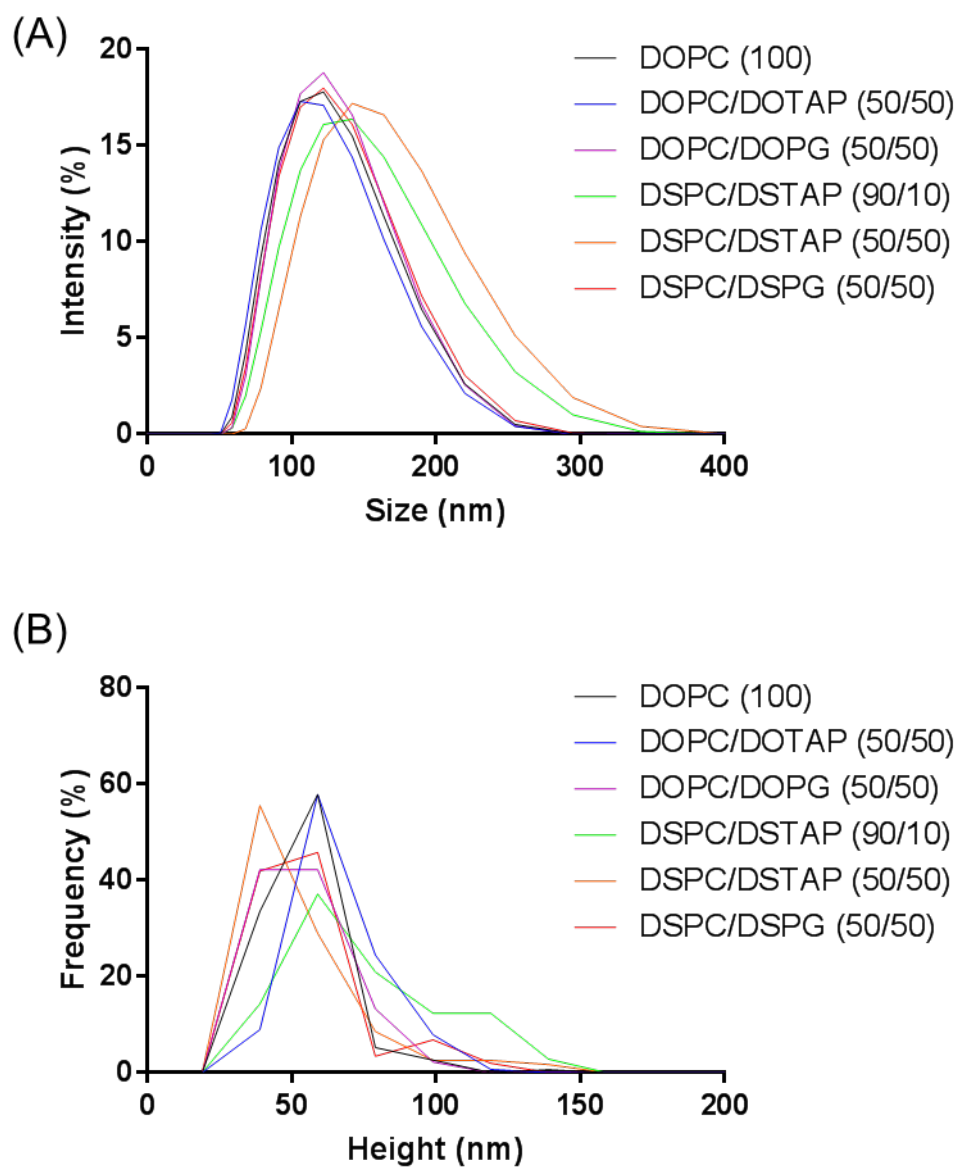

**Figure S1.** Size distribution of liposomes. (A) The light scattering intensity-weighted hydrodynamic diameter distribution of liposomes obtained by DLS. (B) The number-weighted height distribution of liposomes analyzed by AFM.

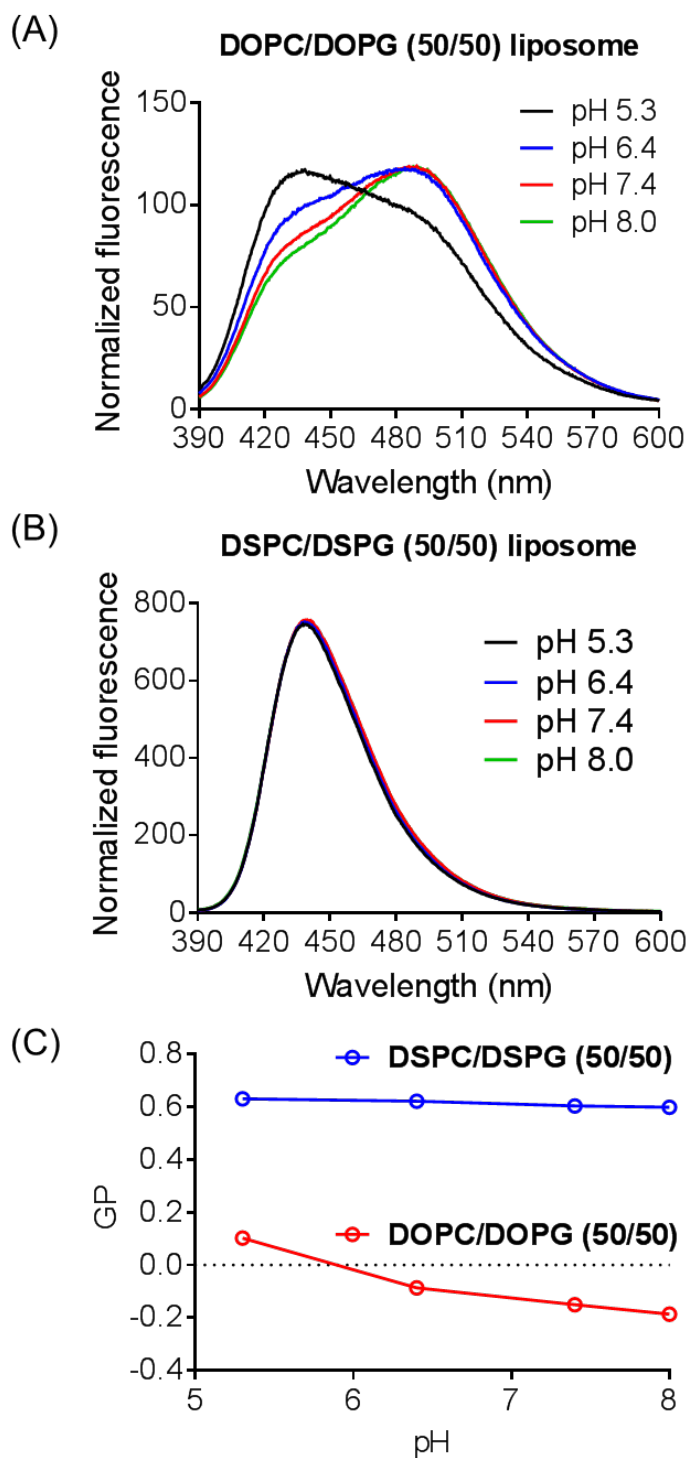

**Figure S2.** Fluorescence measurement of liposomes in 5% w/w glucose aqueous solution at various pH. (A) Fluorescence spectra of Laurdan in DOPC/DOPG (50/50) liposomes. (B) Fluorescence spectra of Laurdan in DSPC/DSPG (50/50) liposomes. (C) Plot of Laurdan GP values against pH values in DOPC/DOPG (50/50) and DSPC/DSTAP (50/50) liposomes.

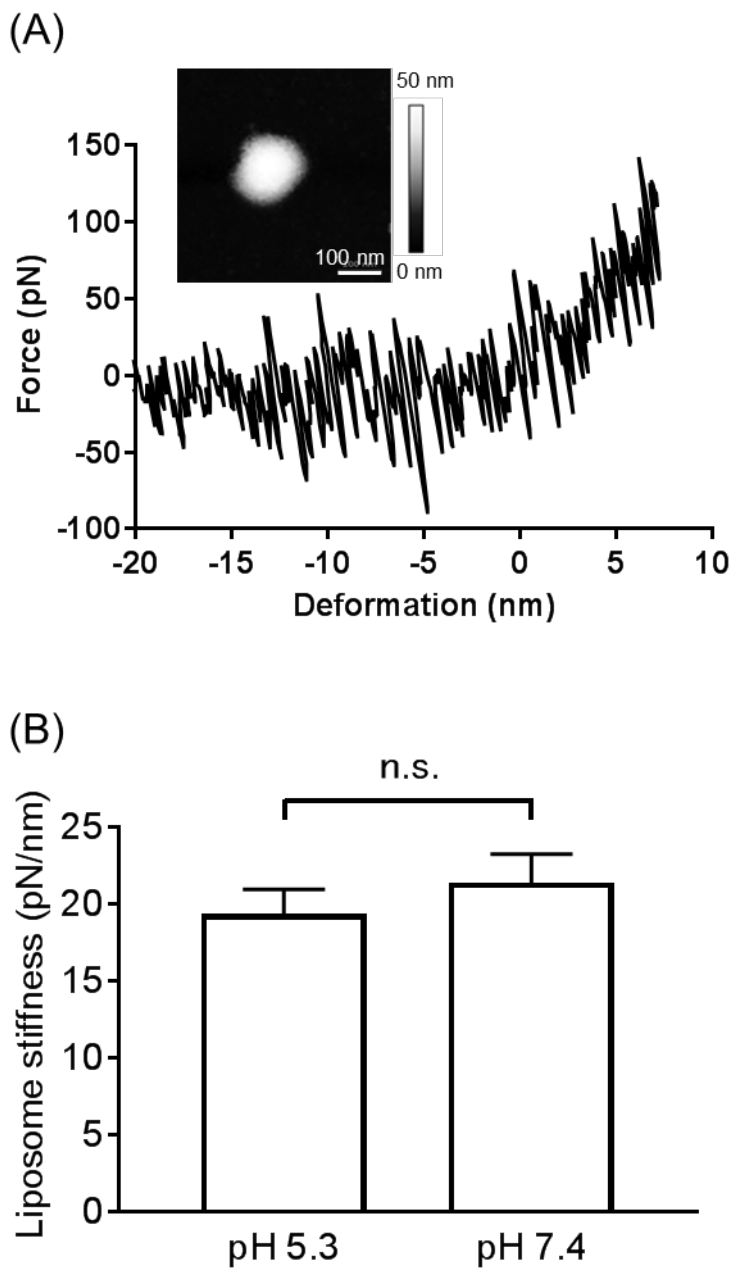

**Figure S3.** (A) AFM measurement of DOPC/DOPG (50/50) liposomes in 5% w/w glucose aqueous solution at pH 7.4. (B) Comparison of stiffness of DOPC/DOPG (50/50) liposomes in 5% w/w glucose aqueous solution at pH 5.3 and 7.4. n.s., not significant by *t*-test. The total number (*N*) of analyzed liposomes: *N* = 52 at pH 5.3, *N* = 36 at pH 7.4.
